# Supplementary material for: Formaldehyde and Glyoxal Measurement Deploying a Selected Ion Flow Tube Mass Spectrometer (SIFT-MS)
Source: Copernicus journal article supplement (doi:10.5194/amt-2021-355), 2021-11-25
Supplement: Supplementary file 1 [file amt-2021-355-supplement.pdf]

Supplement material

# **Formaldehyde and Glyoxal Measurement Deploying a Selected Ion Flow Tube Mass Spectrometer (SIFT-MS)**

**Antonia G. Zogka, Manolis N. Romanias,\* and Frederic Thevenet**

<sup>1</sup> IMT Nord Europe, Institut Mines-Télécom, Univ. Lille, CERI EE, F-59000 Lille, France

\*Corresponding author: [emmanouil.romanias@imt-lille-douai.fr](mailto:emmanouil.romanias@imt-lille-douai.fr)

**Table S1.** Detection limits (in ppb) of glyoxal as a function of relative humidity for standard operation conditions of the SIFT-MS.

| $I_{37}/I_{19}$   | RH (%)      | m/z 59     |             |            | m/z 88     |             |            |
|-------------------|-------------|------------|-------------|------------|------------|-------------|------------|
|                   |             | DL (1 sec) | DL (10 sec) | DL (1 min) | DL (1 sec) | DL (10 sec) | DL (1 min) |
| 0.001             | 0.008 (Dry) | 0.810      | 0.420       | 0.280      | 50.9       | 28.2        | 14.4       |
| 0.06 <sup>a</sup> | 7.1         | 1.60       | 0.840       | 0.550      | 47.4       | 26.2        | 13.4       |
| 0.09              | 10          | 1.80       | 0.950       | 0.620      | 43.5       | 24.0        | 12.3       |
| 0.27              | 30          | 4.80       | 2.50        | 1.60       | 41.8       | 23.1        | 11.8       |
| 0.41              | 50          | 7.70       | 4.00        | 2.60       | 40.2       | 22.2        | 11.3       |
| 0.54              | 70          | 10.7       | 5.60        | 3.70       | 46.7       | 25.8        | 13.2       |

<sup>a</sup>: Determined in THALAMOS Chamber

**Table S2.** Detection limits (in ppb) of glyoxal as a function of relative humidity for custom operation conditions of the SIFT-MS)

| $I_{37}/I_{19}$ | RH (%)      | m/z 59     |             |            | m/z 88     |             |            |
|-----------------|-------------|------------|-------------|------------|------------|-------------|------------|
|                 |             | DL (1 sec) | DL (10 sec) | DL (1 min) | DL (1 sec) | DL (10 sec) | DL (1 min) |
| 0.005           | 0.008 (Dry) | 0.360      | 0.190       | 0.124      | 6.50       | 3.60        | 1.80       |
| 0.28            | 10          | 1.80       | 0.930       | 0.610      | 6.10       | 3.40        | 1.70       |
| 0.56            | 30          | 5.10       | 2.70        | 1.80       | 5.70       | 3.10        | 1.60       |
| 0.79            | 50          | 8.40       | 4.40        | 2.90       | 4.80       | 2.70        | 1.40       |
| 1.00            | 70          | 14.0       | 7.30        | 4.80       | 4.70       | 2.60        | 1.30       |

**Table S3.** Data points extracted from the study of Stoner et al. and used to prepare Fig. 5 right panel. Data points were round to two decimal places.

| $I_{39}/I_{21}$ | sensitivity | Normalized sensitivity |
|-----------------|-------------|------------------------|
| 0.02            | 0.80        | 1                      |
| 0.035           | 0.79        | 0.99                   |
| 0.055           | 0.68        | 0.84                   |
| 0.10            | 0.52        | 0.65                   |
| 0.16            | 0.40        | 0.50                   |
| 0.21            | 0.29        | 0.36                   |
| 0.24            | 0.26        | 0.32                   |

**Table S4.** Data points extracted from the study of Lacko et al. and used to prepare Fig. 6 right panel. Data points were round to two decimal places.

| H    | Absolute signal of FM <sup>+</sup> | Normalized signal of FM <sup>+</sup> | H    | Absolute signal of GL <sup>+</sup> | Normalized signal of GL <sup>+</sup> |
|------|------------------------------------|--------------------------------------|------|------------------------------------|--------------------------------------|
| 0.04 | 0.07                               | 1.00                                 | 0.04 | 0.84                               | 1.00                                 |
| 0.05 | 0.08                               | 1.24                                 | 0.06 | 0.79                               | 0.94                                 |

|      |      |      |      |      |      |
|------|------|------|------|------|------|
| 0.07 | 0.10 | 1.50 | 0.06 | 0.77 | 0.92 |
| 0.09 | 0.12 | 1.75 | 0.07 | 0.74 | 0.89 |
| 0.10 | 0.13 | 1.93 | 0.09 | 0.71 | 0.85 |
| 0.12 | 0.15 | 2.28 | 0.10 | 0.68 | 0.81 |
| 0.14 | 0.18 | 2.68 | 0.12 | 0.64 | 0.77 |
| 0.15 | 0.19 | 2.78 | 0.14 | 0.60 | 0.71 |
| 0.20 | 0.24 | 3.59 | 0.15 | 0.59 | 0.70 |
| 0.22 | 0.26 | 3.84 | 0.21 | 0.51 | 0.61 |
| 0.25 | 0.28 | 4.15 | 0.22 | 0.49 | 0.59 |
| 0.30 | 0.33 | 4.93 | 0.25 | 0.46 | 0.56 |
| 0.36 | 0.38 | 5.65 | 0.30 | 0.41 | 0.49 |
| 0.36 | 0.38 | 5.65 | 0.36 | 0.36 | 0.43 |
| 0.42 | 0.43 | 6.43 | 0.42 | 0.33 | 0.39 |
| 0.51 | 0.48 | 7.11 | 0.51 | 0.30 | 0.35 |
| 0.57 | 0.51 | 7.65 | 0.57 | 0.26 | 0.31 |
| 0.69 | 0.53 | 7.95 | 0.69 | 0.26 | 0.31 |
| 0.78 | 0.59 | 8.83 | 0.78 | 0.22 | 0.26 |
| 0.87 | 0.60 | 8.95 | 0.88 | 0.21 | 0.25 |
| 0.99 | 0.62 | 9.22 | 0.99 | 0.19 | 0.22 |

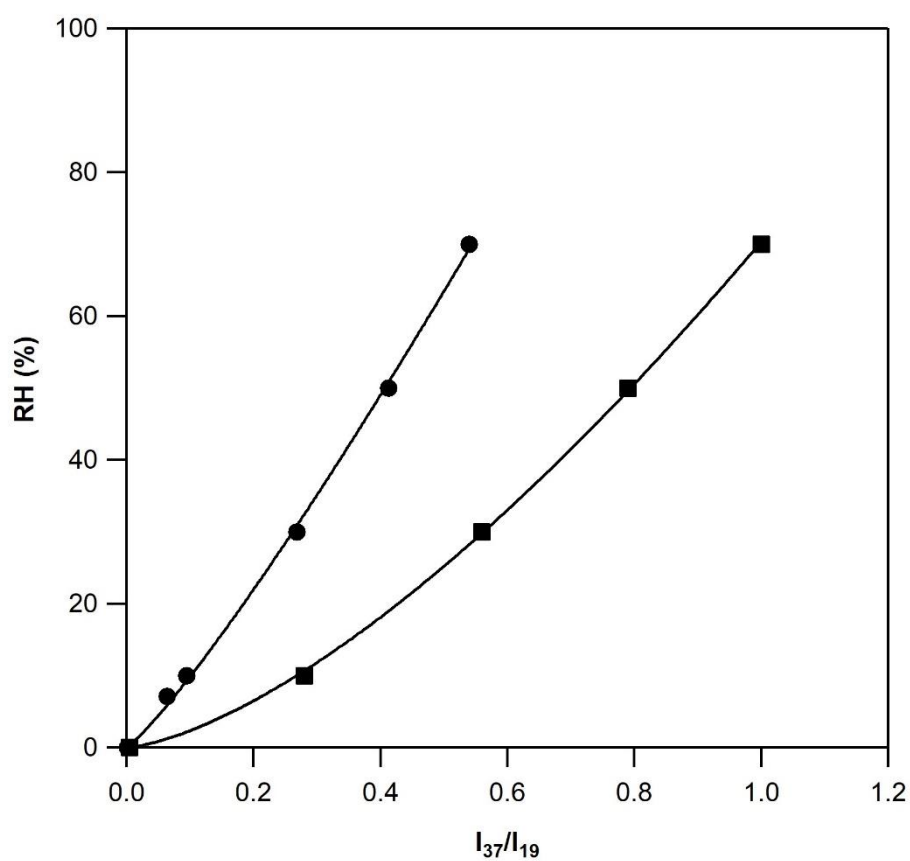

**Figure S1.** Relationship between the relative ratio of mass peaks 37 ( $\text{H}_3\text{O}^+\cdot\text{H}_2\text{O}$  cluster) and 19 ( $\text{H}_3\text{O}^+$ ) with the relative humidity (in %) under SC (circles) and CC (squares) operational conditions.

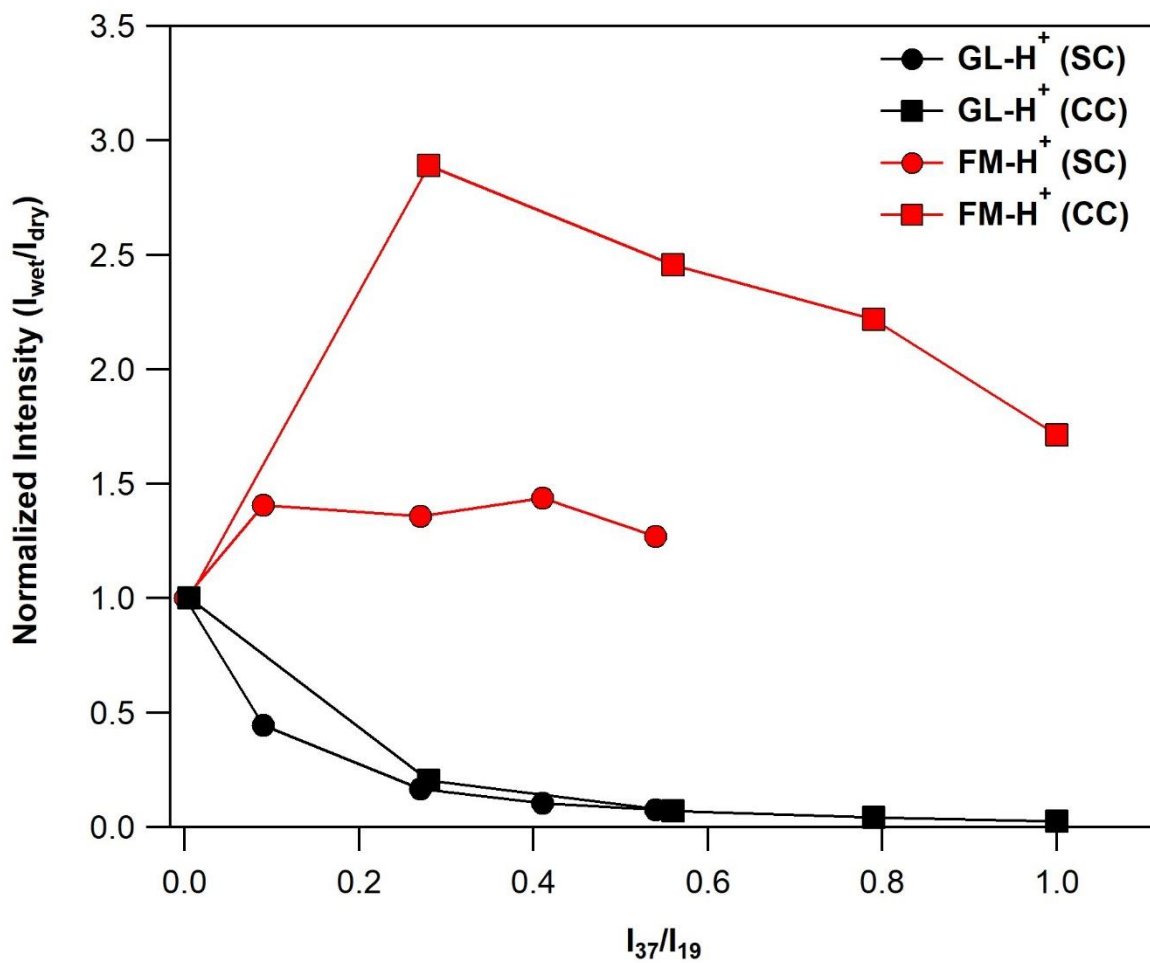

**Figure S2.** Normalized intensity of signals recorded for GL-H<sup>+</sup> and FM-H<sup>+</sup> under SC and OC conditions, versus the  $I_{37}/I_{19}$ . This Figure aims to evaluate the impact of water concentrations in the presence of GL-H<sup>+</sup> and FM-H<sup>+</sup> inside the SIFT-MS flow tube. Therefore, although the fragmentation of GL-H<sup>+</sup> to FM-H<sup>+</sup> is less under CC, the impact of water to FM-H<sup>+</sup> formation is greater.
