# Supplementary material for: Formaldehyde and Glyoxal Measurement Deploying a Selected Ion Flow Tube Mass Spectrometer (SIFT-MS)
Source: Copernicus journal article supplement (doi:10.5194/amt-2021-355), 2021-11-25
Supplement: Supplementary file [file amt-2021-355-AC1-supplement.pdf]

## Replies to reviewer.

### General comment

We would like to thank the reviewer for evaluating our work, and the thorough reading of the manuscript. Detailed answers to his/her comments are presented below.

### Minor comments

1. There are still a few typos in the manuscript that deserve a re-reading. For instance: spaces sometimes missing, double spaces, missing dashes (SIFT-MS line 468)...

**Authors reply:** We performed a thorough reading of the manuscript and corrected typo errors, deleted double spaces, etc.

2. Table 4: these is a reference “b” but the text is missing

**Authors reply:** Typo corrected. We have deleted the annotation “b” from the table and we explicit the meaning of abbreviation n.d. in the table caption.

3. In general, these is a lot of text in the legends of the figures and tables which makes them difficult to read, in particular figures 4 and 5. Some information could appear more clearly directly on the figure. For instance, in figure 5, SC and CC legends should appear clearly on the figure without reading the text (beside each curve, for example).

**Authors reply:** Indeed, in some cases, figure and table captions are long. Nevertheless, we consider this as necessary to describe and present the content of each figure, or table to the readers. Our objective is to provide figures and tables that can stand alone, where the reader can absorb/understand the information presented without searching the relevant information in the main text of the manuscript. Regarding figure 5, our intention is to keep it as it is. There is already a legend in the graph, and we prefer not to include any supplement text inside the Figure. The figure caption presents a detailed description of the operational conditions of SIFT-MS.

4. The numerous abbreviations do not always allow a fluid reading of the manuscript.

**Authors reply:** Indeed there are several abbreviations in the manuscript. Following the reviewer’s comment and aiming to facilitate the reading of the manuscript by the audience of AMT, we decided to include a detailed list of all abbreviations used and their corresponding explanation at the end of the manuscript.
